# Supplementary material
Source: PubMed Central journal article supplement (PMC2721910)
Supplement: NIHMS120074-supplement-1.pdf [file NIHMS120074-supplement-1.pdf]

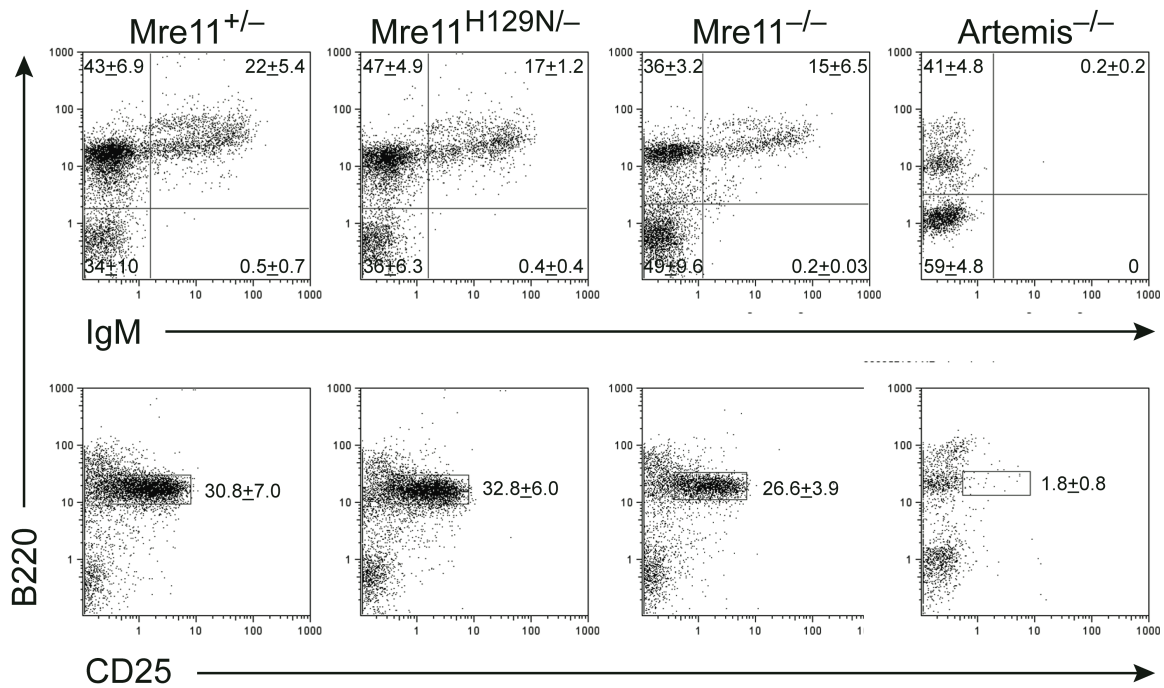

**Supplementary Figure 1. MRN deficiencies generated by CD19-Cre do not block early B cell development.** Flow cytometric analyses of bone marrow using the indicated antibodies. Artemis deficiency was used as a control for early developmental block resulting from defective V(D)J recombination. Three mice of each genotype were analyzed. Numbers in the quadrants represent the averages  $\pm$  S.E.M. B220/IgM positive populations reflect B cells having supported successful V(D)J recombination at the heavy and light chain loci. B220/CD25 positive populations have supported heavy chain, but not light chain, recombination.

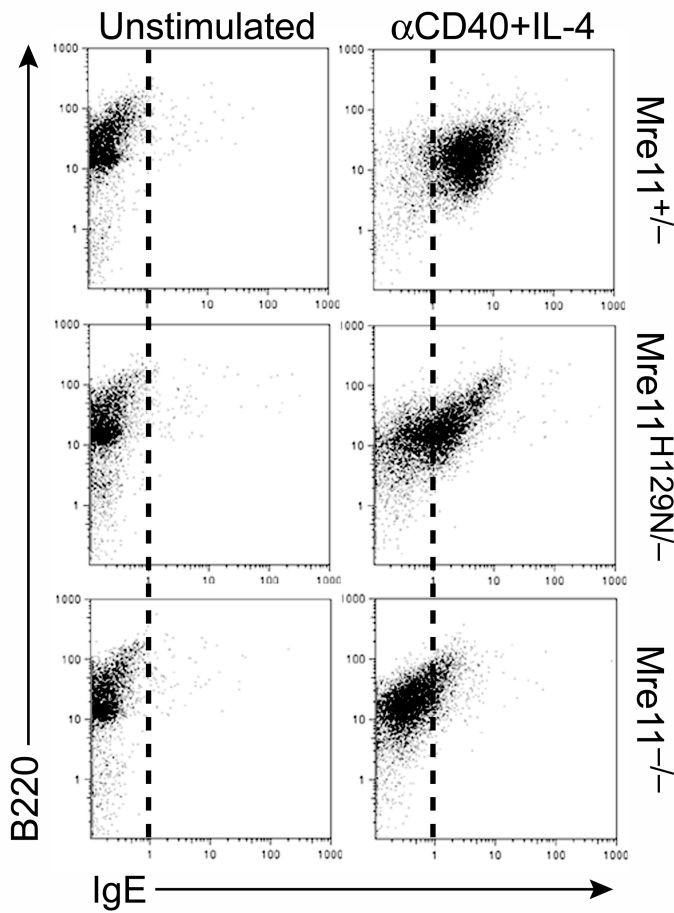

**Supplementary Figure 2. Requirement of MRN for switching to IgE.** Representative flow cytometric analysis of class switching from IgM to IgE in B cells cultured with IL-4 and anti-CD40 for four days. IgE positivity cannot be quantitated precisely due to IgE antibody binding to Fc receptors.

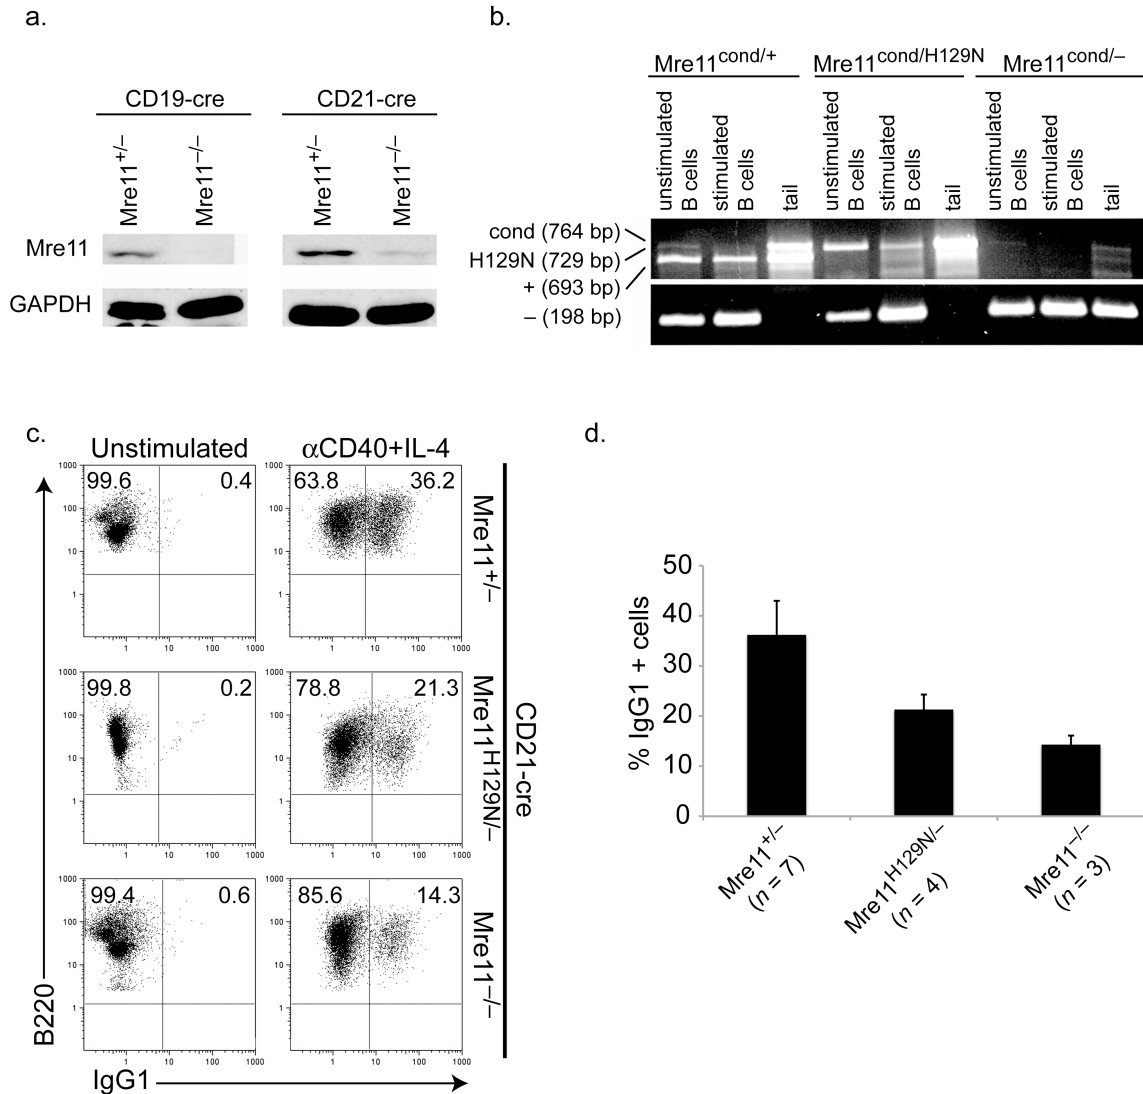

**Supplementary Figure 3. Conversion of Mre11<sup>cond</sup> to Mre11<sup>-</sup> by CD21-Cre.** (a) Western blot analyses comparing Mre11 protein levels in CD19-Cre and CD21-Cre containing mice. Enriched splenic B cells stimulated with IL-4 and anti-CD40 were used. More residual Mre11 protein was reproducibly observed in CD21-Cre relative to CD19-Cre Mre11<sup>-/-</sup> B cell cultures. (b) PCR analyses confirming conversion of Mre11<sup>cond</sup> to Mre11<sup>-</sup> by CD21-Cre in B lymphocytes. Primers used are depicted in figure 1a. (c) Flow cytometric analyses of class switching from IgM to IgG1 in mice harboring CD21-

Cre, which begins expression in mature IgM<sup>+</sup> B cells. Numbers in upper right quadrants represent the average percentage of IgG1<sup>+</sup> cells from three to five mice of each genotype.

(d) Bar graph depicting direct comparisons of IgG1<sup>+</sup> cell populations in (c) (average  $\pm$  S.D).

## Figure S 4 Mre11+/-

### Blunt

#### IgG1

TGCTCTTTTGTAGTACCGTTGTC | TGGGTCACTCACATTTAACTTT  
TGCTCTTTTGTAGTACCGTTGTC | **GT** | TCCAGGGCAGCCAGGACAGGTG  
GGTGACCCAGGCAGAGCAGC | TCCAGGGCAGCCAGGACAGGTG

TGCTCTGTGTGAACCTCCCTCTG | GCCCTGCTTATTGTTGAATGGG  
TACTCTGTGTGAACCTCCCTCTG | **T** | CAGGACAGGTGGAAGTGTGGTGA  
GGCAGAGTAGCTACAGGGAGC | CAGGACAGGTGGAAGTGTGGTGA

ACAGCTGTACAGAATTGAGAAA | GAATAGACACCTGCAGTTGAGG  
ACAGCTGTACAGAATTGAGAAA | **T** | AAGTGTGGAGACCCAGGCAGAG  
ACAGGTAAGCAGGGACAGGTGG | AAGTGTGGAGACCCAGGCAGAG

GAAGAAAAGATGTTTTAGTTT | TTATAGAAAACACTACTACATT  
GAAGAAAAGATGTTTTAGTTT | AGGGCAGCCAGGACAGGTGGAA  
GTGACCCAGGCAGAGCAGCTCC | AGGGCAGCCAGGACAGGTGGAA

CAGTAAGGAGGGACCCAGGCTA | AGAAGGCAATCTGGATTCTG  
CAGTAAGGAGGGACCCAGGCTTA | TATAGGGCAGCCAGGACAGGTG  
GTGGTGACCCAGGCAGAGCAGC | TATAGGGCAGCCAGGACAGGTG

GGTAGGCCTGGACTTTGGGTCT | CCCACCCAGACCTGGGAATGTA  
GGTAGGCCTGGACTTTGGGTCT | **ATAG** | GGGTGCCAGGACAGGTACAAG  
AATATCCAGGCAGAACAGGTCCA | GGGTGCCAGGACAGGTACAAG

AAGAAAAGATGTTTTAGTTT | TATAGAAAACACTACTACATT  
AAGAAAAGATGTTTTAGTTT | GTGACCCAGGCAGAGCATCTAT  
AGCCAGGACAGGTGGAATGTG | GTGACCCAGGCAGAGCATCTAT

#### IgE

AACTGGAATGAACCTCATTAA | CTAGGTTGAATAGAGCTAAACT  
AACTGGAATGAACCTCATTAA | GGCCCGGCTAAGCTAAGTAAGG  
TGGACTGAATTGGCTAAGATG | GGCCCGGCTAAGCTAAGTAAGG

CTGGACTTTGGGTCTCCACCC | AGACCTGGGAATGTATGGTTGT  
CTGGACTTTGGGTCTCCACCC | GAGCTGGGCCAGGCTGGTATGA  
CTGGTCCAAGTTGGGCTAAACA | GAGCTGGGCCAGGCTAGTATGA

AGGCAATCCTGGGATTCTGGAA | GAAAAGATGTTTTAGTTTTA  
AGGCAATCCTGGGATTCTGGAA | **T** | TGGGTTAAACTAGGTTGCACTG  
GTTAACCTGGGCTGGACCATAC | TGGGTTAAACTAGGTTGCACTG

ACAGCTGTACAGAATTGAGAAA | GAATAGACACCTGCAGTTGAGG  
ACAGCTGTACAGAATTGAGAAA | **TC** | GCGGGCGGGGCTAGGCTGGGC  
AGGCAAGGCTGAGCTAGGCTGGG | GCGGGCGGGGCTAGGCTGGGC

GGCCAGCAGGTGGCTGGACTA | ACTCTCCAGCCACAGTAATGAC  
GGCCAGCAGGTGGCTGGACTA | TTTTGTATATCGGTTGAAATG  
GGCAGGGCTGGACTGAGCTAGC | TTTTGTATATCGGTTGAAATG

GATTACGCCGAACTGGAGAGG | TCCTCTTTAACTTATTGAGTT  
GATTACGCCGAACTGGAGAGG | **CAAG** | TTGACCTGGCATGAGCTTAACT  
AGCAGGACTGGCTGGCTGGGA | TTGACCTGGCATGAGCTTAACT

### Microhomology

#### IgG1

TTGAGTACCGTTGTCTGGGTCACTCACATTTAACTTTCTTGT  
TTGAGTACCGTTGTCTGGGT**CA**AGACAGGTGGAAGTGTGGGG  
CACAGTAGCTATAGGGGAGCCAGACAGGTGGAAGTGTGGGG

GCCAGAGGCAGCCACAGCTGTGGCTGTCTCTTAAAGCTTGTGA  
GCCAGAGGCAGCCACACT**GTG**ACTCAGGCAGAGCAGCTCC  
AGCCAGGACAGGTGGAAGTGTGGTGTACCACAGGCAGAGCAGCTCC

GCCAGACTCATAAAGCTTGTCTGAGCAAAATTAAGGGAACAAGGT  
GCCAGACTCATAAAGCTTGTCT**G**CAGCCAGGACAGGTGGGAGTG  
ACCCAGGCAGAGCAGCTTCAGGGCAGCCAGGACAGGTGGGAGTG

CTCTACTTCAGTTATACATGTGGGTTGAATTTGAATCTATTCT  
CTCTACTTCAGTTATACAT**GTG**TGGGGATCCAGGTAAGGCT  
AAGGGAGCCAGAACAGGTGGGAGTGTGGGGATCCAGGTAAGGCT

GCCGCTAAGCTAAACTAGGCTGCCTAACCCAGATGAGCCAAAC  
GCCGCTAAGCTAAACTAGGCT**GTG**ACACAGGCAGAGCAGCTCAT  
GCTAGGACAGGTGGAAGTGTGGTGACCCAGGCAGAGTAGCTCTT

GAATAGAGACCTGCAGTTGAGGCAGCAGGTGCGGCTGGACTAAC  
GAATAGAGACCTGCAGTTG**AGG**AGAAATGGAAGATGCAGA  
GCAGAGTAGCTATAGGGCAGCCAGGAGAAATGGAAGATGCAGA

GGTATGGATACGCAGAAGGAAGGCCACAGCTGTACAGAATTGAG  
GGTATGGATACGCAGAAGGA**AG**CAGGTATAGGGAGCCAGGAC  
GGAAAGTGTGGTGACCCAGGCAGAGCAGCTATAGGGAGCCAGGAC

TGAGTACCGTTGTCTGGGTCACTCACATTTAACTTTCTTGA  
TGAGTACCGTTGTCTGGGT**CA**AGGTGGGAGTGTGGTGACCC  
GAGCAGCTGCAGGGCAGCCAGGACAGGTGGGAGTGTGGTGACCC

GGTGAAGTGTGAGAGGACAGGGCTGGGGTATGGATACGCAGAAG  
GGTGAAGTGTGAGAGAGCAGGG**GG**TGACCCAGGCAGAGCATCTA  
CAGCCAGGACAGGTGGAAGTGTGGTGACCCAGGCAGAGCATCTA

TTAGTTGAGGTACTGATCTCTCTACTTCAGTTATACATGTG  
TTAGTTGAGGTACTGAT**GGT**TTGCAGCTACAGGTAAGC  
CAGGAGGAAAGTGGGGATCCAGGTGTGCAGCTACAGGTAAGC

GGTAGGCCTGGACTTTGGGTCTCCACCCAGACCTGGGAATGTA  
GGTAGGCCTGGACTTTGGGT**CT**ATAGGGGAGCCGGACAGGT  
TGTGGTGACCCAGGCAGAGCAGCTATAGGGGAGCCAGGACAGGT

CAGAAGGAAGGCCACAGCTGTACAGAATTGAGAAGAATAGAGA  
CAGAAGGAAGGCCA**CAGCTGTA**AGGGAGCCAGAAACA  
AAGTGTGGAGACCCAGGCAGAGCAGCTATAAGGGAGCCAGAAACA

GTAAGCCAGAGGCAGCCACAGCTGTGGCTGTCTCTTAAAGCT  
GTAAGCCAGAGGCAGCCAC**AGC**AAGGACAGGGAAACTATAG  
CCAGGCAGAGCAGTACCTTAGGAGCCAGGACAGGGAAGCTATAG

#### IgE

GAACCTCATTAACTAGGTTGAATAGAGCTAAACTCTACTGCCT  
GAACCTCATTAA**CTAAGTTGA**ATTGAGTTGGCT  
TGGCTGAGCTGAGTCAAGATGCTGAGTTGATTGAGTTGGCT

CTAGGTTGAATAGAGCTAACTCTACTGCCTACTGGACTGTT  
CTAGGTTGAATAGAGCTA**AACT**GAGCAGGACTGGCCTGGC  
TAAGCTAAGTAAGGCTGCCCTGA**AACT**GAGCAGGACTGGCCTGGC

GAATTTAAATTGGAAGCTAATTTAGAATCAGTAAGGAGGGACCC  
GAATTTAAATTGGAAGCTAAT**T**GAACTGGCCTGGTCTGGGCTG  
GCTAGGCTGAGCTAGGCTGACCT**G**AAGTGGCCTGGTCTGGGCTG

TGGGGTATGGATACGCAGAAGGAAGGCCACAGCTGTACAGAATT  
TGGGGTATGGATACGCAGAA**GG**TCAGCAGGCCTAAGCAGGC  
TGAGCTGGGATGGGCTGAGATGG**GG**TTACAGCAGGCCTAAGCAGGC

GTTTAATATAGAAGGAATTA**A**ATTGGAAGCTAATTTAGAATCA  
ATTTAATATAGAAGGAATTA**AG**CTACACTGAACTAGGCAAGG  
TTGAGTTGGCTAAGCTAAGCTG**AG**CTACACTGAACTAGGCAAGG

GGATACGCAGAAGGAAGGCCA**C**AGCTGTACAGAATTGAGAAGA  
GGATACGCAGAAGGAAGGCCA**C**GGGGCGGGCTAGGCTGGGCA  
GGCAAGGCTGAGCTAGGCTGGGCAGGGCGGGCTAGGCTGGGCA

ATTAAGGGAACAAGGTTGAGAGCCCTAGTAAGCGAGGCTCAAA  
ATTAAGGGAACAAGGTTGAGAG**G**CTGGGCGGGCGGGGCTAGG  
TTAGCTAGGCAAGGCTGAGCTA**G**GCTGGGCGGGCGGGGCTAGG

## Figure S5 Mre11 H129N/-

### Blunt

#### IgG1

AGCTGTGGCTGCTGCTCTTAAA | GCTTGTAAACTGTTTCTGCTTA  
AGCTGTGGCTGCTGCTCTTAAA | CCAGGACAGGTGGAAAGTGTGG  
AGGCAGAGCAGCTCCAGGGCAG | CCAGGACAGGTGGAAAGTGTGG

AAGCTTGTAAACTGTTTCTGCT | TAAGAGGGACTGAGTCTTCAGT  
AAGCTTGTAAACTGTTTCTGCT | AGCCAGGAGAGGTAGAATTGTG  
CCAGGAAGAGTAGCTACAGGGG | AGCCAGGAGAGGTAGAATTGTG

GACCTGGGAATGTATGGTTGTG | GCTTCTGCCACCCATCCACCTG  
GACCTGGGAATGTATGGTTGTG | AGGGAGCCAGGACAGGTGGAA  
GTGACCCAGGCAGAGCAGCTAT | AGGGAGCCAGGACAGGTGGAA

TGAGTGCTTCTAAATGCGCTA | AACTGAGGTGATTACTCTGAGG  
TGAGTGCTTCTAAATGCGCTA | GGAATCCAGTTGAGGTGGAAAG  
GATACAGGCAGGGTAGCTATAG | GGAATCCAGTTGAGGTGGAAAG

GACTGTAATGAACTGGAATGAG | CTGGCCCGCTAAGCTAAACTAG  
GACTGTAATGAACTGGAATGAG | TATAGGGAGCCAGGACAGGTGG  
GTGGTGACCCCTGGCAGAGCAGC | TATAGGGAGCCAGGACAGGTGG

TGGAATGAACTTCATTAATCTA | GGTGTAATAGAGCTAAACTCTA  
TGGAATGAACTTCATTAATCTA | AGAGCATCTATAGGGGAACCAG  
GTGGAAATGTGGTGACCCAGGC | AGAGCATCTATAGGGGAACCAG

AGGCACCGCAAATGGTAAGCCA | GAGGCAGCCACAGCTGTGGCTG  
AGGCACCGCAAATGGTAAGCCA | TGACCCAGGCAGGACATCTATA  
GCCAGGACAGGTGGAAAGTGTGG | TGACCCAGGCAGGACATCTATA

#### IgE

GGACAGTGCTTAGATCCAAGGT | GAGTGTGAGAGGACAGGGGCTG  
GGACAGTGCTTAGATCCAAGGT | AAATA | ACTGAACTAGGCAAGGCTGGGG  
TGGCTAAGCTAAGCTGAGCTAC | ACTGAACTAGGCAAGGCTGGGG

TAACCAATAATCATAGAGCTCA | TGGTATTTTGGAGAAATCTAG  
TAACCAATAATCATAGAGCTCA | CTG | ACTAGGCAAGGCTGGCTGGAA  
AAGCTAAGCTGAGCTACACTGA | ACTAGGCAAGGCTGGGCTGGAA

ACTCATAAAGCTTGCTGAGCAA | AATTAAGGGAACAAGGTTGAGA  
ACTCATAAAGCTTGCTGAGCAA | TAAACTGGGTTGCACTGGCTGG  
CCTGGGCTGGACCATACTGGGT | TAAACTAGGTTGCACTGGCTGG

TGAGATACTCTGGAGTAGCTGA | GATGGGCTGAGATGGGGTGAGC  
TGAGATACTCTGGAGTAGCTGA | CTACACTAGCCTGACCTGAGCT  
GGCTGGGCTAAGCTGAGCTGGT | CTACACTAGCCTGACCTGAGCT

### Microhomology

#### IgG1

ATACGCAGAAGGAAGGCCACAGCTGTACAGAATTGAGAAAGAAT  
ATACGCAGAAGGAAGGCCA**CA**GGCAGAGCAGCTGCAGGGCA  
GACAGGTGGAAAGTGTGGTGACCCAGGCAGAGCAGCTGCAGGGCA

GGTGAGATGGGGTGAGCTGAGCTGGGCTGAGCTAGACTGAGCTG  
GGTGAGATGGGGTGAGCT**GAGC**AGCTACAGGGGAGCTAGG  
TGGGAGTGTGGTGACCCAGGCAGAGCAGCTACAGGGGAGCTAGG

GGTAAGCCAGAGGCAGCCACAGCTGTGGCTGCTGCTCTAAAGC  
GGTAAGCCAGAG**GCAGCCACAG**GGGAGCCAGGAC  
GGAGTGTGGTGACCCAGGCAGAGCAGCTACAGGGGAGCCAGGAC

TTCATTAATCTAGGTTGAATAGAGCTAAACTCTACTGCCTACAC  
TTCATTAATCTAGGTTGAATAG**G**TAGGGAAATCAGGACAGGTAC  
TGGGACCCCTGTAGGGCAGCTGTAGGGAAATCAGGACAGGTAC

GCCAGACTCATAAAGCTTGCTGAGCAAAATTAAGGGAACAAGT  
GCCAGACTCATAAAGCTTGCT**TG**CAAAACAGCTCCAGGGGAGC  
CAGGTGGAAAGTGTAGGGATTATGCAAAACAGCTCCAGGGGAGC

CTGGAAGAAAAGATGTTTTT**AG**TTTTTATAGAAAACACTACTAC  
CTGGAAGAAAAGATGTTTTT**AG**CTATAAGGGAGCCAGAACAG  
AGTGTGGAGACCCAGGCAGAGCAGCTATAAGGGAGCCAGAACAG

GCCTACACTGGACTGTTCTGAGCTGAGATGAGCTGGGGTGAGCT  
GCCTACACTGGACTGTTCT**GAG**TCAGGACAGGTGGGAGTGT  
ACCCTGGCAGAGCAGCTATAGG**AG**CCAGGACAGGTGGGAGTGT

CTACACTGGACTGTTCTGAGCTGAGATGAGCTGGGGTGAGCTCA  
CTACACTGGACTGTTCTGAGCT**TC**CAAAACAGAAAGACTACAGAG  
AGGAGAAATGGAAAGATGCAGAT**TC**CAAAACAGAAAGACTACAGAG

AAAATGTTGCCTGTTAAACCAATAATCATAGAGCTCATGGTATTT  
AAAATGTTGCCTGTTAAACCA**AT**GGTGACCCAGGCAGAGCAGCT  
GGAGCCAGGACAGGTGGAAAGTGTGGTGACCCAGGCAGAGCAGCT

TACTTCCTGGTTGTTAAAGAA**T**GGTATCAAAGGACAGTGCTTAG  
TACTTCCTGGTTGTTAAAGAA**T**TGGGAGCCTGAACAGATAGAA  
TGGATCCATGCAGTGTAGTGCTTGGGAGCCTGAACAGATAGAA

GCTGAGCTTGGCTGAGCTAGGG**T**GAGCTGGGCTGAGCTGGGGTG  
GCTGAGCTTGGCTGAGCTAG**GG**GAGGCAAGACAGGTGGAAAG  
GACTCCAGGCACAGTAGCTATAGGGGAGCCAAAGACAGGTGGAAAG

TTGTCTGGAATATTTTCAGTTA**AG**TGTATTAGTTGAGGACTGA  
TTGTCTGGAATATTTTCAGTTA**AG**CAGGTGGAAAGTGTAGTGACCC  
AGCTACATACGGGTAAGCAGGG**AC**AGGTGGAAAGTGTAGTGACCC

#### IgE

TAAAATGGATACTCAGTGGTITTTAATGGTGGGTTTAAATATAG  
TAAAATGGATACTCAGTGGT**T**GGGAGGGCTGGTCTCAGCTA  
ACTGGCTGGTCTGGGCTGGAC**T**GGGACAGGGCTGGTCTCAGCTA

GTGTGAACTCCCTCTGGCC**CT**GCTTATTGTTGAATGGGCCAAAG  
GTGTGAACTCCCTCTGGCC**CTG**GGCTGGCTGGGCTGGGCT  
AGCTGGGTTAAGTATGGCTGGGCTGGGCTGGCTGGGCTGGGCT

TTAGATAAAATGGATACTCAGTGGTITTTAATGGTGGGTTTAA  
TTAGATAAAATGGATACTC**AG**GGCCGGCTAAGCTAAGTAAGG  
TGGACTGAATTGGCTAAGATGGGCCCGGCTAAGCTAAGTAAGG

CTGAGCTGAGATGGGTTGGCTTCTCTGAGTCTTCTAAATGCG  
CTGAGCTGAGATGGGTTGGCT**T**GGCCTGGTCTGGGCTGGACTG  
GCTGAGCTAGGCTGACCTGAAC**T**GGCCTGGTCTGGGCTGGACTG

CTGAGCTAGGGTGAGCTGAGCTGGGTGAGCTGAGCTAAGCTGGG  
CTGAGCTAGGGTGAG**CTGAGCT**AGATTTGTATATTC  
GGCTAGGCTGGGACAGGGCTGGACT**GAGCT**AGCTTTTGTATATTC

GAGTACCGTTGTCTGGG**CACT**CACATTTAACTTTCTTTGAAAA  
GAGTACCGTTGTCTGGG**CACT**AAGCAGGACTAGGCTGGAA  
TAGTATGAGCTGGTCTGA**CACT**AAGCAGGACTAGGCTGGG

Sequences of CSR joins from Mre11H129N/- stimulated B cells

**Figure S6 Mre11 -/-**

**Blunt**

**IgG1**

AGAATCAGTAAGGAGGGACCCA | GGCTAAGAAGGCAATCCTGGGA  
 AGAATCAGTAAGGAGGGACCCA | CAGGACAGGTGGAATGTGGT  
 GGCAGAGCAGCTCCAGGGGAGC | CAGGACAGGTGGAATGTGGT

AGCCAGCCTCGTGGCTTTGAA | GGAACAATCCACACAAGACT  
 AGCCAGCCTCGTGGCTTTGAA | AGGACAGGTGGAAGTGTAGGA  
 GCAGAGTAGCTCTTAGGGAGCC | AGGACAGGTGGAAGTGTAGGA

CTGAAATGAGATACTCTGGAGT | AGCTGAGATGGGTGAGATGGG  
 CTGAAATGAGATACTCTGGAGT | CAGGACAGGTGGGAGTGTGGT  
 GGCAGAGCAGCTCAGGGGAGC | CAGGACAGGTGGGAGTGTGGT

AATTAAGGGAACAAGGTTGAGA | GCCCTAGTAAGCAGGCTCTAA  
 AATTAAGGGAACAAGGTTGAGA | TGACCAGGCAGAGCAGCTGC  
 AACCAGGACAGGTGGAAGTGTGG | TGACCAGGCAGAGCAGCTGC

CAGTAAGGAGGGACCCAGGCTA | AGAAGGCAATCCTGGGATTCTG  
 CAGTAAGGAGGGACCCAGGCTA | CAGGAAGGTGGAAGTGTGGT  
 GGCAGAGCAGCTCCTAGGGCAGC | CAGGACAGGTGGAATGTGGT

AGCTGGCCGCTAAGCTAAACT | AGGCTGGCTTAACCGAGATGAG  
 AGCTGGCCGCTAAGCTAAACT | CAGGGAAGCTATAGGAAACCA  
 AGCAGTGCCTTAGGAGGAGC | CAGGGAAGCTATAGGAAACCA

TGAGATGGGTGGGCTTCTCTGA | GTGCTTCTAAATCGCTAAAC  
 TGAGATGGGTGGGCTTCTCTGA | CCAGGACAGGTGGGAGTGTGG  
 AGGCAGAGCATCTATAGGGAGC | CCAGGACAGGTGGGAGTGTGG

AATTGAGAAGAATAGAGACCT | GCAGTTGAGGCCAGCAGGTCCG  
 AATTGAGAAGAATAGAGACCT | ATAGAAGTTTGTTA | AATTGAGAAGAATAGAGACCT  
 CCAAGACAATAGAAGTGTGTG | AATCCAGGCAGAGCAGTGCCTT

**IgE**

GCTGGCCGCTAAGCTAAACTA | GGCTGGCTTAACCGAGATGAGC  
 GCTGGCCGCTAAGCTAAACTA | TAAGGCTGCCTGAACTGAGCA  
 AGATGGCCGCTAAGCTAAG | TAAGGCTGCCTGAACTGAGCA

GTTTATGAATTTGAAGTTGCC | AGTAATGTACTTCTGGTTGT  
 GTTTATGAATTTGAAGTTGCC | GGCTGAGCTGAGTCAAGATGTT  
 TAGACTGGCTGAGCTGGGCT | GGCTGAGCTGAGTCAAGATGTT

TTGTGTCTTTTGTAGTACCGT | TGTCTGGGCTCACTCACATTTAA  
 TTGTGTCTTTTGTAGTACCGT | A | CTGGGTTAGACTTGGCTGAGCT  
 GGGTTAACTAGGTGCACTGGCTGGGTAGACTTGGCTGAGCT

GTCACTCACATTTAACTTTCT | TGAAAACTAGTAAAGAAAAA  
 GTCACTCACATTTAACTTTCT | ACCTGGGCTGGACCACTAGTGG  
 TCAGTAGACTACACTGAGTTA | ACCTGGGCTGGACCACTAGTGG

CTGAGCAAAATTAAGGGAACAA | GGTTGAGAGCCCTAGTAAGCGA  
 CTGAGCAAAATTAAGGGAACAA | ACTGGGCTGAGCTAAGTTGCAC  
 GACCTGAGCTAGGTAGGCTGG | ACTGGGCTGAGCTAAGTTGCAC

**Microhomology**

**IgG1**

ACCAGGCTAAGAAGGCAATCCTGGGATTCTGGAAGAAAAGATG  
 ACCAGGCTAAGAAGCAATCAGATGCAAGGGCAGCCAGGACA  
 GAGTGTGGTACCCAGTCAAGAGCAGCTGACAGGGCAGCCAGGACA

TTTGAAGGAACAATTCACACAAGAAGCTCTGGACCTCTCCGAAA  
 TTTGAAGGAACAATTCACACAAGCTACAGGGGAGCCAGGACA  
 AAGTGAAGGGAGCCAGGCAGAGCAGCTACAGGGGAGCCAGGACA

GCTGCTGCTCTTAAAGCTTGTAACTGTTTCTGCTTAAAGGGGA  
 GCTGCTGCTCTTAACTTGTAACTGTTTCTGCTTAAAGGGGA  
 GAGCAGCTATAGGAGAGCCAGGAGCAGGTGGAATGTGGTACCC

AATGTTGCCTGTTAAACCAATATCATAGAGCTCATGGTATTTG  
 AATGTTGCCTGTTAAACCAATATCATAGAGCTCATGGTATTTG  
 CCAGGGCAGCCAGGACAGGTGGAAGTGTGGTACCCAGGCAGAG

ATGGTGGTTTAATATAGAAGGAATTTAATTGGAAGCTAATTT  
 ATGGTGGTTTAATATAGAAGGACAGGACCTCCAGGGCAG  
 ACAGGTGGGAGTGTGGTACCCAGGACAGCAGCAGCCTCCAGGGCAG

GTAATGAAGTGAATGAGCTGGCCGCTAAGCTAACTAGGCTG  
 GTAATGAAGTGAATGAGCTGGCCGCTAAGCTAACTAGGCTG  
 GCAGCCAGGACAGGTGGAATGTGGTACCCAGGCAGAGTAGCT

AGTAAAAGAAAAATGTTGCCTGTTAAACCAATATCATAGAGCT  
 AGTAAAAGAAAAATGTTGCCTGTTAAACCAATATCATAGAGCT  
 ATGTGGTACCCAGGACAGGACAGCAGCTATAGGGGAGCCAGGACAGT

CTTGAAGGAGGCTGATACAATGTTGGAATTTTTCAGTAAAG  
 CTTGAAGGAGGCTGATACAATGTTGGAATTTTTCAGTAAAG  
 CAGGACAGGTGGAAGTGTGGGATTTATGCAAAAACAGCTCCAGG

GGCTGCTGCTCTTAAAGCTTGTAACTGTTTCTGCTTAAAGGGG  
 GGCTGCTGCTCTTAAAGCTTGTAACTGTTTCTGCTTAAAGGGG  
 AGCTCCAGGGGAGCCAGGACAGGTTGGAAGTGTGGATCCAGGC

CAGGAAAGCCAGACTCATAAAGCTTGTGAGCAAAAATTAAGGG  
 CAGGAAAGCCAGACTCATAAAGCTTGTGAGCAAAAATTAAGGG  
 ACTGGGAGTCAAGGTAGTGGAAATGTGAAGTTCAGGCAGAAC

TAGGCTGGCTTAAACCGAGATGAGCCAACTGGAATGAATTCAT  
 TAGGCTGGCTTAAACCGAGATGAGCCAACTGGAATGAATTCAT  
 ATACAGGCAGGGTAGCTATAGGAAATCCAGTTGAGGTGGAAGAA

AGTATTCAATTTAGGAGAAATCTTTTTTTTAAATGAATGCAA  
 AGTATTCAATTTAGGAGAAATCTTTTTTTTAAATGAATGCAA  
 GCAGCTATAAGGGAGCCAGAACAGGTTGGGAGTGTGGGATCCAG

AATAATCATAGAGCTCAGGTAATTTTGGAGAAATCTTGAAGAAC  
 AATAATCATAGAGCTCAGGTAATTTTGGAGAAATCTTGAAGAAC  
 GCAGCTGATAGGAAATCAGGACAGGTAACAAGTGTGTGGATTCAT

CAGACTCATAAAGCTTGTGAGCAAAAATTAAGGGAACAAGTTG  
 CAGACTCATAAAGCTTGTGAGTACCTTAGGAGCAAGG  
 TAGAAGTGTGTAATCCAGGCAAGCAGTACCTTAGGAGCAAGG

GCTTAAAGGGGACTGAGTCTTCACTAGTCTTTTGGGGGAGAA  
 GCTTAAAGGGGACTGAGTCTTCACTAGTCTTTTGGGGGAGAA  
 AGGACAGGTGGAAGTGTGGTACCCAGGCAGAGCAGCTATAGGG

ACTGTTCTGAGCTGAGATGAGCTGGGGTGAGCTCAGCTATGCTA  
 ACTGTTCTGAGCTGAGATGAGCTGGGGTGAGCTCAGCTATGCTA  
 CCAGGCAGAGCATCTATAGGGGAGCCAGGACAGGTGGGAGTGTG

CTGGGCTGAGCTGGGGTGAAGCTGAGCTGAGCTGGGGTAAAGCTGG  
 CTGGGCTGAGCTGGGGTGAAGCTGAGCTGAGCTGGGGTAAAGCTGG  
 TGTGTGACCCAGGCAGAGCATCTATAGGGTACCCAGGACAGGT

ACGCTGTGTTGGGCTGAGCTGATCTGAAATGAGATACTCTGGAG  
 ACGCTGTGTTGGGCTGAGCTGATCTGAAATGAGATACTCTGGAG  
 CCCAGGCAGAGCAGCTCCAGGGAGCCAGGACAGGTGGGAGTGT

GGTATGGATACGCAGAAAGGCCACAGCTGTACAGAATTGAG  
 GGTATGGATACGCAGAAAGGCCACAGCTGTACAGAATTGAG  
 GCTATAGGGAGCCAGGACAGGTGGAGTGTGTTGATCCAGACAA

GTCTTTTGTAGTACCGTTGCTGGGCTCACTCACATTTAACTTTCC  
 GTCTTTTGTAGTACCGTTGCTGGGCTCACTCACATTTAACTTTCC  
 AGTAGAGGGAGCCAGGACAGGTGGAGTGTGTTGATCCAGACAA

TTGGAAGCTAATTTAGAAATCAGTAAGGAGGCCAGGCTAAGA  
 TTGGAAGCTAATTTAGAAATCAGTAAGGAGGCCAGGCTAAGA  
 GAGCAGCTCCAGGGACCCAGGACAGGTGGAAGTGTGGTACCC

GTGGTTTTAATGGTGGGTTTTAATATAGAAGAAATTTAAATGG  
 GTGGTTTTAATGGTGGGTTTTAATATAGAAGAAATTTAAATGG  
 GCAGAGCATCTATAGGGGAGCCAGGACAGGTGGGAGTGTGGTA

GGGCCGCTAAGCTAACTAGGCTGGCTTAAACCGAGATGAGCCAA  
 GGGCCGCTAAGCTAACTAGGCTGGCTTAAACCGAGATGAGCCAA  
 CAGGCAGAGTAGCTATAGGGGAGCCAGGAGAAATGGAAGAATGC

GAAGTTGCCAGTAAATGTACTTCTGTTGTTAAAGAATGGTAT  
 GAAGTTGCCAGTAAATGTACTTCTGTTGTTAAAGAATGGTAT  
 GGGGAGCCAGGAAAGTGGAAATGTGGTACCCAGGCAGAGCAG

**IgE**

AGGTTGAATAGAGCTAAACTCTACTGCCTACACTGGACTGTTCT  
 AGGTTGAATAGAGCTAAACTCTACTGCCTACACTGGACTGTTCT  
 AGCTGGCTTACACTAGCTGACTGAGCTAGGCTAGGCTGGACT

CAAAATTAAGGGAACAAGGTTGAGAGCCCTAGTAAGCAGGCTC  
 CAAAATTAAGGGAACAAGGTTGAGAGCCCTAGTAAGCAGGCTC  
 TGGGTTAACTAGTTGCAGCTGCTGGTGTAGACTTGGCTGAGC
